# Supplementary material
Source: ML conference proceedings conference paper supplement (https://proceedings.mlr.press/v48/shibagaki16.html)
Supplement: Supplementary file 1 [file shibagaki16-supp.zip]

## A. Proofs

### A.1. Proof of Lemma 1

*Proof.* Since  $P_\lambda(w)$  is  $\lambda$ -strongly convex,  $\forall w_1, w_2 \in \text{dom} P_\lambda$ ,

$$P_\lambda(w_1) \geq P_\lambda(w_2) + g_{P_\lambda}(w_2)^\top (w_1 - w_2) + \frac{\lambda}{2} \|w_1 - w_2\|_2^2,$$

where,  $g_{P_\lambda}(w) \in \partial P_\lambda(w)$ . On the other hand,  $\forall \hat{w} \in \text{dom} P_\lambda$ ,  $g_{P_\lambda}(w^*)^\top (\hat{w} - w^*) \geq 0$  (see Proposition B.24 in (Bertsekas, 1999)). Also, from weak duality,  $\forall \hat{\alpha} \in \text{dom} D_\lambda$ ,  $D(\hat{\alpha}) \leq P_\lambda(w^*)$ . By substituting  $w_1 = \hat{w}$ ,  $w_2 = w^*$ ,

$$\frac{\lambda}{2} \|\hat{w} - w^*\|_2^2 \leq P_\lambda(\hat{w}) - D_\lambda(\hat{\alpha}).$$

Therefore,  $w^*$  is within a region  $\Theta_{w^*}$ , where

$$\Theta_{w^*} := \{ w \mid \|\hat{w} - w\|_2 \leq \sqrt{2G_\lambda(\hat{w}, \hat{\alpha})/\lambda} \}.$$

Since  $\Theta_{w^*}$  is Sphere, a lower bound of  $x_i^\top w^*$  and an upper bound of  $x_i^\top w^*$  are given in closed form as follows:

$$\begin{aligned} LB(x_i^\top w^*) &= x_i^\top \hat{w} - \|x_i\|_2 \sqrt{2G_\lambda(\hat{w}, \hat{\alpha})/\lambda}, \\ UB(x_i^\top w^*) &= x_i^\top \hat{w} + \|x_i\|_2 \sqrt{2G_\lambda(\hat{w}, \hat{\alpha})/\lambda}. \end{aligned}$$

■

### A.2. Proof of Theorem 2

*Proof.* Supposing that the result of the previous safe sample screening step assures the optimal values  $\alpha_i^*$  for a subset of the samples  $i \in \mathcal{S} \subset [n]$ , the dual optimal solution region is written as

$$\tilde{\Theta}_{\alpha^*} := \{ \alpha \in \Theta_{\alpha^*} \mid \alpha_i = \alpha_i^* \forall i \in \mathcal{S} \}.$$

Then,  $X_{:,j}^\top \alpha^*$  is bounded from above by the following upper bound:

$$\begin{aligned} \tilde{UB}(X_{:,j}^\top \alpha^*) &:= \max_{\alpha \in \tilde{\Theta}_{\alpha^*}} X_{:,j}^\top \alpha \\ &= \sum_{i \in \mathcal{S}} \alpha_i^* X_{ij} + \max_{\alpha_{\mathcal{U}_s}} X_{\mathcal{U}_s, j}^\top \alpha_{\mathcal{U}_s} \\ &\quad \text{s.t. } \|\hat{\alpha}_{\mathcal{U}_s} - \alpha_{\mathcal{U}_s}\|_2^2 \leq r_D^2 - \|\hat{\alpha}_{\mathcal{S}} - \alpha_{\mathcal{S}}^*\|_2^2 \\ &= \sum_{i \in \mathcal{S}} \alpha_i^* X_{ij} + X_{\mathcal{U}_s, j}^\top \hat{\alpha}_{\mathcal{U}_s} + \|X_{\mathcal{U}_s, j}\|_2 \sqrt{r_D^2 - \|\hat{\alpha}_{\mathcal{S}} - \alpha_{\mathcal{S}}^*\|_2^2} \\ &= X_{:,j}^\top \hat{\alpha} + \|X_{\mathcal{U}_s, j}\|_2 \sqrt{r_D^2 - \|\hat{\alpha}_{\mathcal{S}} - \alpha_{\mathcal{S}}^*\|_2^2}. \end{aligned}$$

Similarly,  $X_{:,j}^\top \alpha^*$  is bounded from below by the following lower bound:

$$\tilde{LB}(X_{:,j}^\top \alpha) := X_{:,j}^\top \hat{\alpha} - \|X_{\mathcal{U}_s, j}\|_2 \sqrt{r_D^2 - \|\hat{\alpha}_{\mathcal{S}} - \alpha_{\mathcal{S}}^*\|_2^2}.$$

Therefore,

$$\tilde{UB}(|X_{:,j}^\top \alpha|) = |X_{:,j}^\top \hat{\alpha}| + \|X_{\mathcal{U}_s, j}\|_2 \sqrt{r_D^2 - \|\hat{\alpha}_{\mathcal{S}} - \alpha_{\mathcal{S}}^*\|_2^2}.$$

Since  $\tilde{\Theta}_{\alpha^*} \subset \Theta_{\alpha^*}$ , the upper bound in (16) is tighter than or equal to that in (9), i.e.,  $\tilde{UB}(|X_{:,j}^\top \alpha^*|) \leq UB(|X_{:,j}^\top \alpha^*|)$ . ■

### A.3. Proof of Theorem 3

*Proof.* Supposing that the result of the previous safe feature screening step assures that  $w_j^* = 0$  for a subset of the features  $j \in \mathcal{F} \subset [d]$ , the primal optimal solution region is written as

$$\tilde{\Theta}_{w^*} := \{ w \in \Theta_{w^*} \mid w_j = 0 \forall j \in \mathcal{F} \}.$$

Then,  $x_i^\top w^*$  is bounded from below by the following lower bound:

$$\begin{aligned} \tilde{LB}(x_i^\top w) &:= \min_{w \in \tilde{\Theta}_{w^*}} x_i^\top w \\ &= \min_w x_i^\top w \text{ s.t. } \|\hat{w} - w\|_2^2 \leq r_P^2, \hat{w}_j = 0 \forall j \in \mathcal{F} \\ &= \min_w x_{i\mathcal{U}_f}^\top w_{\mathcal{U}_f} \text{ s.t. } \|\hat{w}_{\mathcal{U}_f} - w_{\mathcal{U}_f}\|_2^2 \leq r_P^2 - \|\hat{w}_{\mathcal{F}}\|_2^2 \\ &= x_{i\mathcal{U}_f}^\top \hat{w}_{\mathcal{U}_f} - \|x_{i\mathcal{U}_f}\|_2 \sqrt{r_P^2 - \|\hat{w}_{\mathcal{F}}\|_2^2}. \end{aligned}$$

Similarly,  $x_i^\top w^*$  is bounded from above by the following upper bound:

$$UB(x_i^\top w^*) = x_{i\mathcal{U}_f}^\top \hat{w}_{\mathcal{U}_f} + \|x_{i\mathcal{U}_f}\|_2 \sqrt{r_P^2 - \|\hat{w}_{\mathcal{F}}\|_2^2}.$$

Since  $\tilde{\Theta}_{w^*} \subset \Theta_{w^*}$ , these bounds in (17) are tighter than or equal to those in (15), i.e.,  $\tilde{LB}(x_i^\top w^*) \geq LB(x_i^\top w^*)$  and  $UB(x_i^\top w^*) \leq UB(x_i^\top w^*)$ . ■

### A.4. Proof of Theorem 6

The convex conjugate functions of  $L_1$ -penalty and vanilla hinge loss are respectively written as

$$\psi^*(v) := \begin{cases} 0 & (\|v\|_\infty \leq 1), \\ \infty & (\text{otherwise}), \end{cases} \quad (19)$$

$$\ell_i^*(\alpha_i) := \begin{cases} y_i \alpha_i & y_i \alpha_i \in [-1, 0], \\ \infty & (\text{otherwise}), \end{cases} \quad (20)$$

and the dual problem is written as

$$\begin{aligned} \max_{\alpha} D_\lambda(\alpha) &:= \max_{\alpha} \{ y^\top \alpha \} \\ \text{s.t. } &\left\| \frac{1}{\lambda n} \alpha_i x_i \right\|_\infty \leq 1, y_i \alpha_i \in [0, 1] \quad \forall i \in [n]. \end{aligned}$$

We first construct the the dual optimal solution region  $\tilde{\Theta}_{\alpha^*}$ .

**Lemma 8.** For an arbitrary pair of primal feasible solution  $\hat{w} \in \text{dom}P_\lambda$  and dual feasible solution  $\hat{\alpha} \in \text{dom}D_\lambda$ , the dual optimal solution region is written as

$$\Theta_{\alpha^*} := \{ \forall i \ y_i \alpha_i \in [0, 1] \mid y^\top \hat{\alpha} \leq y^\top \alpha \leq P_\lambda(\hat{w}) \}.$$

*Proof of Lemma 8.* From the optimality and weak duality  $y^\top \hat{\alpha} \leq y^\top \alpha^*$  and  $y^\top \alpha^* \leq P_\lambda(\hat{w})$ , respectively. Therefore,

$$\alpha^* \in \hat{\Theta}_{\alpha^*} := \{ \alpha \in \text{dom}D_\lambda \mid y^\top \hat{\alpha} \leq y^\top \alpha \leq P_\lambda(\hat{w}) \}.$$

Noting that  $\hat{\Theta}_{\alpha^*} \subseteq \Theta_{\alpha^*}$ ,  $\alpha^* \in \Theta_{\alpha^*}$ . ■

*Proof of Theorem 6.* From Lemma 8,

$$X_{:,j}^\top \alpha^* \geq LB(X_{:,j}^\top \alpha^*) := \min_{\alpha \in \Theta_{\alpha^*}} X_{:,j}^\top \alpha$$

Moreover,

$$LB(X_{:,j}^\top \alpha^*) = \min_{\alpha \in \Theta_{\alpha^*}} Z_{:,j}^\top \alpha_y,$$

where  $\alpha_y := [y_1 \alpha_1, \dots, y_n \alpha_n]^\top$ . Let us define three  $n$ -dimensional vectors  $\bar{\alpha}^{(1)}$ ,  $\bar{\alpha}^{(2)}$  and  $\bar{\alpha}^{(3)}$  as follows:

$$\begin{aligned} \bar{\alpha}_i^{(1)} &:= \begin{cases} y_i & (Z'_{ij} < 0) \\ 0 & (\text{otherwise}), \end{cases} \\ \bar{\alpha}_i^{(2)} &:= \begin{cases} y_i & (Z'_{ij} \leq Z'_{l_q j}) \\ y_i(y^\top \hat{\alpha} - l_q) & (Z'_{ij} = Z'_{(l_q+1)j}) \\ 0 & (\text{otherwise}), \end{cases} \\ \bar{\alpha}_i^{(3)} &:= \begin{cases} y_i & (Z'_{ij} \leq Z'_{u_q j}) \\ y_i(P_\lambda(\hat{w}) - u_q) & (Z'_{ij} = Z'_{(u_q+1)j}) \\ 0 & (\text{otherwise}). \end{cases} \end{aligned}$$

If  $l_q + 1 \leq n_{Z'_{:,j}} \leq u_q$ , then  $\bar{\alpha}^{(1)}$  is an element of  $\Theta_{\alpha^*}$  and minimizes  $X_{:,j}^\top \alpha$ . If  $n_{Z'_{:,j}} < l_q + 1$  then  $\bar{\alpha}^{(1)} \notin \Theta_{\alpha^*}$ ,  $\bar{\alpha}^{(2)}$  is an element of  $\Theta_{\alpha^*}$  and minimizes  $X_{:,j}^\top \alpha$  because  $y^\top \bar{\alpha}^{(2)} = y^\top \hat{\alpha}$ . If  $n_{Z'_{:,j}} > u_q$  then  $\bar{\alpha}^{(1)} \notin \Theta_{\alpha^*}$ , meaning that  $\bar{\alpha}^{(3)}$  is an element of  $\Theta_{\alpha^*}$  and minimizes  $X_{:,j}^\top \alpha$  because  $y^\top \bar{\alpha}^{(3)} = P_\lambda$ . Therefore,

$$LB(X_{:,j}^\top \alpha^*) := \begin{cases} \sum_{i=1}^{l_q} Z'_{ij} + (y^\top \hat{\alpha} - l_q) Z'_{(l_q+1)j} & (n_{Z'_{:,j}} < l_q + 1), \\ \sum_{i=1}^{u_q} Z'_{ij} + (P_\lambda(\hat{w}) - u_q) Z'_{u_q j} & (n_{Z'_{:,j}} > u_q) \\ \sum_{i=1}^n \min\{0, Z'_{ij}\} & (\text{otherwise}), \end{cases}$$

Similarly, from Lemma 8,

$$X_{:,j}^\top \alpha^* \leq UB(X_{:,j}^\top \alpha^*) := \max_{\alpha \in \Theta_{\alpha^*}} X_{:,j}^\top \alpha$$

Moreover,

$$UB(X_{:,j}^\top \alpha^*) = \max_{\alpha \in \Theta_{\alpha^*}} Z_{:,j}^\top \alpha_y.$$

Let us define three  $n$ -dimensional vectors  $\bar{\alpha}^{(4)}$ ,  $\bar{\alpha}^{(5)}$  and  $\bar{\alpha}^{(6)}$  as follows:

$$\begin{aligned} \bar{\alpha}_i^{(4)} &:= \begin{cases} y_i & (Z'_{ij} > 0) \\ 0 & (\text{otherwise}), \end{cases} \\ \bar{\alpha}_i^{(5)} &:= \begin{cases} y_i & (Z'_{ij} \geq Z'_{(n-l_q)j}) \\ y_i(y^\top \hat{\alpha} - l_q) & (Z'_{ij} = Z'_{(n-l_q-1)j}) \\ 0 & (\text{otherwise}), \end{cases} \\ \bar{\alpha}_i^{(6)} &:= \begin{cases} y_i & (Z'_{ij} \geq Z'_{(n-u_q)j}) \\ y_i(P_\lambda(\hat{w}) - u_q) & (Z'_{ij} = Z'_{(n-u_q-1)j}) \\ 0 & (\text{otherwise}). \end{cases} \end{aligned}$$

If  $l_q + 1 \leq p_{Z'_{:,j}} \leq u_q$ , then  $\bar{\alpha}^{(4)}$  is an element of  $\Theta_{\alpha^*}$  and maximizes  $X_{:,j}^\top \alpha$ . If  $p_{Z'_{:,j}} < l_q + 1$  then  $\bar{\alpha}^{(4)} \notin \Theta_{\alpha^*}$ ,  $\bar{\alpha}^{(5)}$  is an element of  $\Theta_{\alpha^*}$  and maximizes  $X_{:,j}^\top \alpha$  because  $y^\top \bar{\alpha}^{(5)} = y^\top \hat{\alpha}$ . If  $p_{Z'_{:,j}} > u_q$  then  $\bar{\alpha}^{(4)} \notin \Theta_{\alpha^*}$ , meaning that  $\bar{\alpha}^{(6)}$  is an element of  $\Theta_{\alpha^*}$  and maximizes  $X_{:,j}^\top \alpha$  because  $y^\top \bar{\alpha}^{(6)} = P_\lambda$ . Therefore,

$$UB(X_{:,j}^\top \alpha^*) := \begin{cases} \sum_{i=n-l_q}^n Z'_{ij} + (y^\top \hat{\alpha} - l_q) Z'_{(n-l_q-1)j} & (p_{Z'_{:,j}} < l_q + 1), \\ \sum_{i=n-u_q}^n Z'_{ij} + (P_\lambda(\hat{w}) - u_q) Z'_{(n-u_q-1)j} & (p_{Z'_{:,j}} > u_q), \\ \sum_{i=1}^n \max\{0, Z'_{ij}\} & (\text{otherwise}). \end{cases}$$

On the other hand, from KKT condition(6),

$$\frac{1}{\lambda n} X_{:,j}^\top \alpha^* \in \begin{cases} \frac{w_j^*}{|w_j^*|} & (w_j^* \neq 0) \\ [-1, 1] & (\text{otherwise}). \end{cases} \quad (21)$$

Therefore, if  $LB(X_{:,j}^\top \alpha^*) < -\lambda n$  and  $UB(X_{:,j}^\top \alpha^*) > \lambda n$  then  $w_j^* = 0$ . ■

### A.5. Proof of Theorem 7

First, we construct the primal optimal solution region  $\Theta_{w^*}$ .

**Lemma 9.** The primal optimal solution region  $\Theta_{w^*}$  is given  $\forall \hat{w} \in \text{dom}P_\lambda$  as

$$\Theta_{w^*} = \{ w \in \text{dom}P_\lambda \mid \lambda \|w\|_1 + g_\ell(\hat{w})^\top w \leq k \}, \quad (22)$$

where  $g_\ell(w) := \frac{1}{n} \sum_{i \in [n]} g_{\ell_i}(w)$ .

*Proof.* From Proposition B.24 in (Bertsekas, 1999),

$$(\lambda g_\psi(w^*) + g_\ell(w^*))^\top (w^* - \hat{w}) \leq 0, \forall \hat{w} \in \text{dom}P_\lambda,$$

where  $g_\psi(w) \in \partial\psi(w)$ . Form the convexity of  $\ell_i$  for  $i \in [n]$  and the definition of subgradient

$$\begin{aligned} \ell_i(w^*) &\geq \ell_i(\hat{w}) + g_{\ell_i}(\hat{w})(w^* - \hat{w}), \forall w^* \in \text{dom}P_\lambda \\ \ell_i(\hat{w}) &\geq \ell_i(w^*) + g_{\ell_i}(w^*)(\hat{w} - w^*), \forall \hat{w} \in \text{dom}P_\lambda, \end{aligned}$$

and thus,  $g_{\ell_i}(w^*)^\top(w^* - \hat{w}) \geq g_{\ell_i}(\hat{w})^\top(w^* - \hat{w})$ ,  $\forall \hat{w} \in \text{dom}P_\lambda$ . Therefore,  $\forall \hat{w} \in \text{dom}P_\lambda$ ,

$$\lambda g_\psi(w^*)^\top w^* + g_\ell(\hat{w})^\top w^* \leq \lambda g_\psi(w^*)^\top \hat{w} + g_\ell(\hat{w})^\top \hat{w}.$$

Since  $g_\psi(\hat{w})^\top \hat{w} = \|\hat{w}\|_1 = \max_{s \in [-1, 1]^d} s^\top \hat{w}$  and  $g_\psi(w^*) \in [-1, 1]^d$ , we have

$$\lambda g_\psi(w^*)^\top \hat{w} \leq \lambda g_\psi(\hat{w})^\top \hat{w}.$$

By combining these results,

$$\lambda \|w^*\|_1 + g_\ell(\hat{w})^\top w^* \leq k, \quad \forall \hat{w} \in \text{dom}P_\lambda.$$

■

*Proof of Theorem 7.* From Lemma 9,

$$x_i^\top w^* \geq LB(x_i^\top w^*) := \min_{w \in \Theta_{w^*}} x_i^\top w.$$

Using a Lagrange multiplier  $\mu > 0$ ,

$$\begin{aligned} LB(x_i^\top w^*) &= \min x_i^\top w \text{ s.t. } w \in \Theta_{w^*} \\ &= \min_w \max_{\mu > 0} \{x_i^\top w + \mu(\lambda \|w\|_1 + g_\ell(\hat{w})^\top w - k)\} \\ &= \max_{\mu > 0} \{\mu k + \min_{L(w)} \underbrace{(x_i^\top w + \mu \lambda \|w\|_1 + \mu g_\ell(\hat{w})^\top w)}\} \end{aligned} \quad (23)$$

Since  $0 \in \partial L$ , which is written as  $\partial L = x_i + \mu \lambda \partial \psi(w) + \mu g_\ell(\hat{w})$ , we have

$$\mu \lambda g_\psi(w) = -x_i - \mu g_\ell(\hat{w}) \quad (24)$$

Substituting  $\mu \lambda \|w\| = -x_i^\top w - \mu g_\ell(\hat{w})^\top w$  into (23),

$$\begin{aligned} LB(x_i^\top w^*) &= \max_{\mu > 0} \{\mu k\} \\ \text{s.t. } &\left\| -\frac{1}{\lambda} x_i^\top w - \frac{\mu}{\lambda} g_\ell(\hat{w})^\top w \right\|_\infty \leq \mu, \end{aligned}$$

where the constraint comes from (24). Similarly, since

$$x_i^\top w^* \leq UB(x_i^\top w^*) := \max_{w \in \Theta_{w^*}} x_i^\top w = -\min_{w \in \Theta_{w^*}} x_i^\top w,$$

$$\begin{aligned} UB(x_i^\top w^*) &= \max_{\mu > 0} \{\mu k\} \\ \text{s.t. } &\left\| \frac{1}{\lambda} x_i^\top w - \frac{\mu}{\lambda} g_\ell(\hat{w})^\top w \right\|_\infty \leq \mu. \end{aligned}$$

■

## B. Safe keeping by using KKT optimality conditions

In this appendix, we describe another type of safe keeping approaches based on KKT optimality conditions.

**Theorem 10.** For an arbitrary pair of primal feasible solution  $\hat{w} \in \text{dom}P_\lambda$  and dual feasible solution  $\hat{\alpha} \in \text{dom}D_\lambda$ ,

$$LB(X_{:j}^\top \alpha^*) < -\lambda n \text{ and } \lambda n < UB(X_{:j}^\top \alpha^*) \Rightarrow w_j^* \neq 0$$

for  $j \in [d]$ , where

$$\begin{aligned} LB(X_{:j}^\top \alpha^*) &:= X_{:j}^\top \hat{\alpha} - \|X_{:j}\|_2 \sqrt{2n G_\lambda(\hat{w}, \hat{\alpha})/\gamma}, \\ UB(X_{:j}^\top \alpha^*) &:= X_{:j}^\top \hat{\alpha} + \|X_{:j}\|_2 \sqrt{2n G_\lambda(\hat{w}, \hat{\alpha})/\gamma}. \end{aligned}$$

*Proof.* In the case that  $D_\lambda$  is  $\gamma/n$ -strongly concave,  $X_{:j}^\top \alpha^*$  is bounded from below and above respectively by the following lower and upper bounds:

$$\begin{aligned} LB(X_{:j}^\top \alpha^*) &:= X_{:j}^\top \hat{\alpha} - \|X_{:j}\|_2 \sqrt{2n G_\lambda(\hat{w}, \hat{\alpha})/\gamma}, \\ UB(X_{:j}^\top \alpha^*) &:= X_{:j}^\top \hat{\alpha} + \|X_{:j}\|_2 \sqrt{2n G_\lambda(\hat{w}, \hat{\alpha})/\gamma}. \end{aligned}$$

On the other hand, in the case of our specific regularization term (2), from KKT optimality condition (6), if  $-\lambda n < X_{:j}^\top \alpha^* < \lambda n$  then  $w_j^* \neq 0$ .

Therefore,

$$LB(X_{:j}^\top \alpha^*) < -\lambda n \text{ and } \lambda n < UB(X_{:j}^\top \alpha^*) \Rightarrow w_j^* \neq 0$$

■

Similarly, we can develop safe sample keeping based on KKT optimality condition.

**Theorem 11.** For an arbitrary pair of primal feasible solution  $\hat{w} \in \text{dom}P_\lambda$  and dual feasible solution  $\hat{\alpha} \in \text{dom}D_\lambda$ , if  $\ell_i$  is smoothed hinge loss then, for  $y_i = +1$ ,

$$1 - \gamma < LB(x_i^\top w^*) \text{ and } UB(x_i^\top w^*) < 1 \Rightarrow \alpha_i^* \notin \{0, +1\},$$

and, for  $y_i = -1$ ,

$$-1 < LB(x_i^\top w^*) \text{ and } UB(x_i^\top w^*) < \gamma - 1 \Rightarrow \alpha_i^* \notin \{-1, 0\}.$$

If  $\ell_i$  is smoothed  $\varepsilon$ -insensitive loss then

$$-\gamma + y_i - \varepsilon < LB(x_i^\top w^*) \text{ and } UB(x_i^\top w^*) < y_i - \varepsilon$$

or

$$\begin{aligned} y_i + \varepsilon &< LB(x_i^\top w^*) \text{ and } UB(x_i^\top w^*) < \gamma + y_i + \varepsilon \\ &\Rightarrow \alpha_i^* \notin \{-1, 0, +1\}, \end{aligned}$$

for  $j \in [d]$ , where

$$\begin{aligned} LB(x_i^\top w^*) &= x_i^\top \hat{w} - \|x_i\|_2 \sqrt{2G_\lambda(\hat{w}, \hat{\alpha})/\lambda}, \\ UB(x_i^\top w^*) &= x_i^\top \hat{w} + \|x_i\|_2 \sqrt{2G_\lambda(\hat{w}, \hat{\alpha})/\lambda}. \end{aligned}$$

*Proof.* In the case that  $P_\lambda$  is  $\lambda$ -strongly convex,  $x_i^\top w^*$  is bounded from below and above respectively by the following lower and upper bounds:

$$\begin{aligned} LB(x_i^\top w^*) &= x_i^\top \hat{w} - \|x_i\|_2 \sqrt{2G_\lambda(\hat{w}, \hat{\alpha})/\lambda}, \\ UB(x_i^\top w^*) &= x_i^\top \hat{w} + \|x_i\|_2 \sqrt{2G_\lambda(\hat{w}, \hat{\alpha})/\lambda}. \end{aligned}$$

On the other hand, from KKT optimality condition (6), in the case of smoothed hinge loss (3), if  $y_i = +1$  and  $1 - \gamma < x_i^\top w^* < 1$  then  $\alpha_i^* \in \{0, +1\}$ , if  $y_i = 1$  and  $-1 < x_i^\top w^* < \gamma - 1$  then  $\alpha_i^* \in \{-1, 0\}$ . Therefore,

$$\begin{aligned} y_i = +1 \text{ and } 1 - \gamma < LB(x_i^\top w^*) \text{ and } UB(x_i^\top w^*) < 1 \\ \Rightarrow \alpha_i^* \notin \{0, +1\}, \\ y_i = -1 \text{ and } -1 < LB(x_i^\top w^*) \text{ and } UB(x_i^\top w^*) < \gamma - 1 \\ \Rightarrow \alpha_i^* \notin \{-1, 0\}. \end{aligned}$$

Also, in the case of smoothed  $\varepsilon$ -insensitive (4), if  $-\gamma + y_i - \varepsilon < x_i^\top w^* < y_i - \varepsilon$  or  $y_i + \varepsilon < x_i^\top w^* < \gamma + y_i + \varepsilon$  then,  $\alpha_i^* \notin \{-1, 0, +1\}$ . Therefore,

$$\begin{aligned} -\gamma + y_i - \varepsilon < LB(x_i^\top w^*) \text{ and } UB(x_i^\top w^*) < y_i - \varepsilon \\ \text{or} \\ y_i + \varepsilon < LB(x_i^\top w^*) \text{ and } UB(x_i^\top w^*) < \gamma + y_i + \varepsilon \\ \Rightarrow \alpha_i^* \notin \{-1, 0, +1\}, \end{aligned}$$

■

## C. Other experiments

In this appendix, we show the rest of the experimental results.

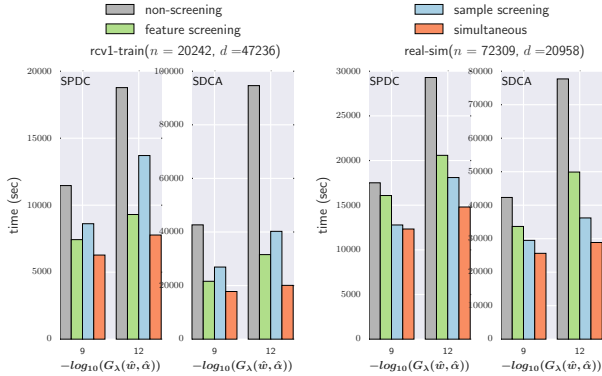

Figure 5. Total computation time for training 100 solutions for various values of  $\lambda$  in regression problems.

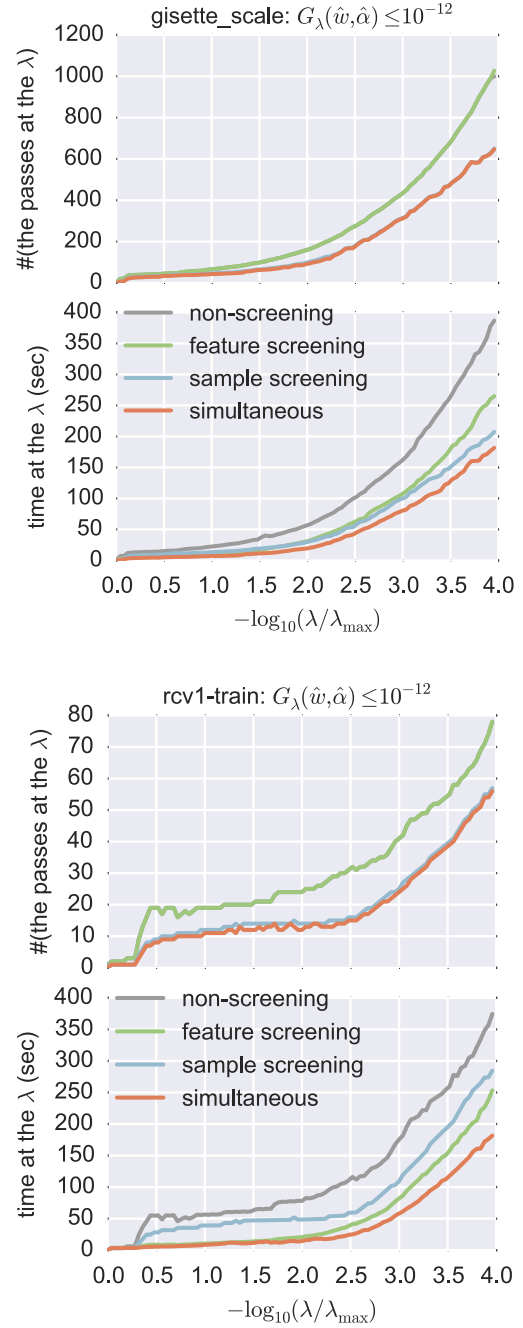

Figure 6. Number of optimization steps and computation time in classification problems (rcv1-train and rcv1-train datasets). See the caption in Figure 4.

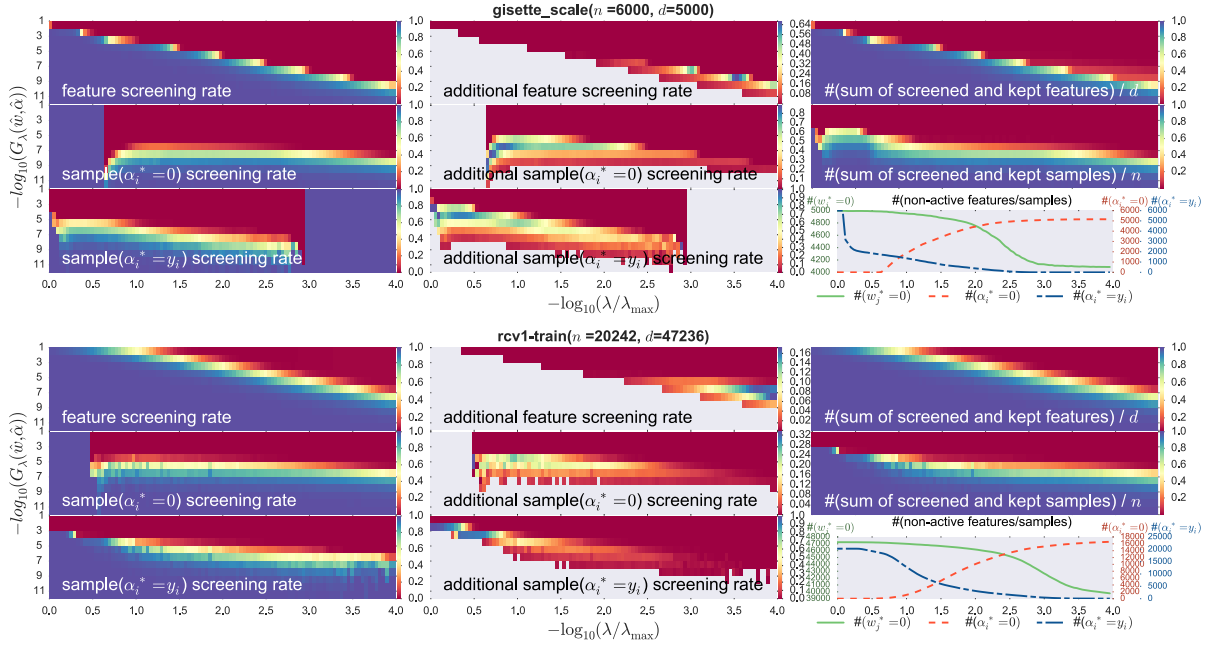

Figure 7. Safe screening and keeping rates in classification problems (rcv1-train and rcv1-train datasets). See the caption in Figure 2.

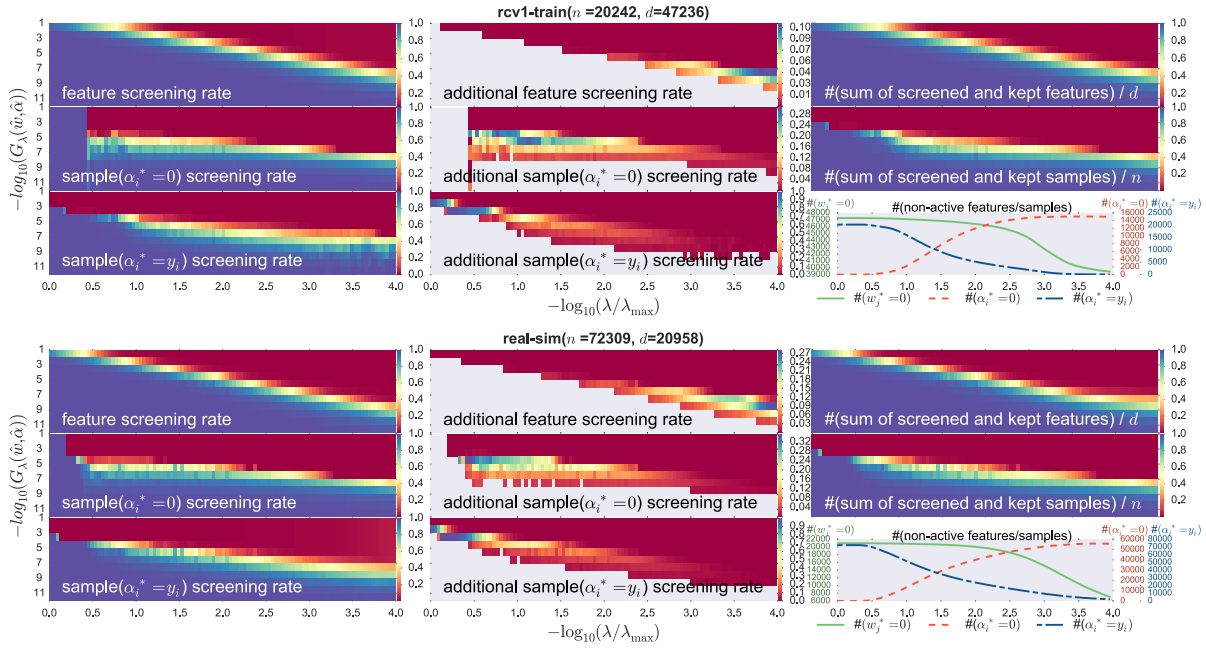

Figure 8. Safe screening and keeping rates in regression problems. See the caption in Figure 2.
